# Supplementary material
Source: PubMed Central journal article supplement (PMC7326446)

# THE LANCET

## Haematology

### Supplementary appendix

This appendix formed part of the original submission and has been peer reviewed.  
We post it as supplied by the authors.

Supplement to: Goshua G, Pine AB, Meizlish ML, et al. Endotheliopathy in COVID-19-associated coagulopathy: evidence from a single-centre, cross-sectional study. *Lancet Haematol* 2020; published online June 30. [https://doi.org/10.1016/S2352-3026\(20\)30216-7](https://doi.org/10.1016/S2352-3026(20)30216-7).

**Appendix Table 1. Additional patient characteristics.** Anticoagulation treatments, intubation status, and presence of acute respiratory distress syndrome are shown at the time at which coagulation factors were drawn. Abbreviations: ACE, angiotensin converting enzyme; ARB, angiotensin II receptor blocker; ARDS, acute respiratory distress syndrome.

|                                                        | ICU (n = 48) | Non-ICU (n = 20) |
|--------------------------------------------------------|--------------|------------------|
| <b>History of cigarette smoking</b>                    | 3 (6%)       | 3 (15%)          |
| <b>Tocilizumab</b>                                     | 46 (96%)     | 2 (10%)          |
| <b>Antihypertensive medication use</b>                 | 26 (54%)     | 8 (40%)          |
| <b>ACE inhibitor or ARB</b>                            | 15 (31%)     | 3 (15%)          |
| <b>Other antihypertensive medication</b>               | 18 (38%)     | 6 (30%)          |
| <b>Statin use</b>                                      | 15 (31%)     | 5 (25%)          |
| <b>No anticoagulation</b>                              | 3 (6%)       | 0 (0%)           |
| <b>Prophylactic anticoagulation</b>                    | 22 (46%)     | 19 (95%)         |
| <b>Intermediate-dose anticoagulation</b>               | 13 (27%)     | 0 (0%)           |
| <b>Therapeutic anticoagulation</b>                     | 10 (21%)     | 1 (5%)           |
| <b>ARDS (PaO<sub>2</sub>/FiO<sub>2</sub> &lt; 300)</b> | 28 (58%)     | 0 (0%)           |

**Appendix Figure 1.** Correlations matrix with coagulation factors for (A) all patients, (B) ICU patients.

Correlations of statistical significance ( $P < 0.050$ ) are denoted with the  $P$  value in italics below the correlation coefficient. Abbreviations: DD, D-dimer; TAT, thrombin-antithrombin complexes; VWF:Ag, von Willebrand factor antigen; sP-selectin, soluble P-selectin; sTM, soluble thrombomodulin; sCD40L, soluble CD40 ligand.

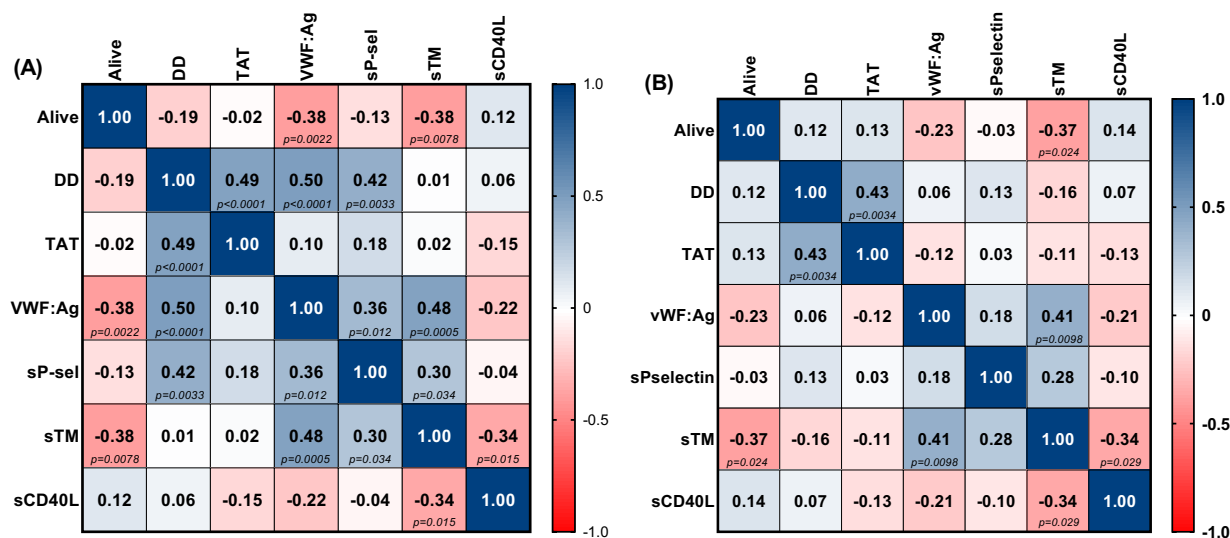

Supplement: mmc1.pdf [file mmc1.pdf]
